# Supplementary material for: An Alternative Splice Variant of HIPK2 with Intron Retention Contributes to Cytokinesis
Source: MDPI journal article supplement (doi:10.3390/cells9020484), 2020-02-20
Supplement: s1 [file s1]

# **An alternative splice variant of HIPK2 with intron retention contributes to cytokinesis**

**Veronica Gatti, Manuela Ferrara, Ilaria Virdia, Silvia Matteoni, Laura Monteonofrio, Simona Di Martino, Maria Grazia Diodoro, Giuliana Di Rocco, Cinzia Rinaldo, Silvia Soddu**

## **Supplementary Data**

### **Table of Contents**

- 1) Supplementary Figure S1**
- 2) Supplementary Figure S2**
- 3) Supplementary Figure S3**
- 4) Supplementary Figure S4**
- 5) Supplementary Figure S5**
- 6) Supplementary Figure S6**

## Supplementary Figure S1

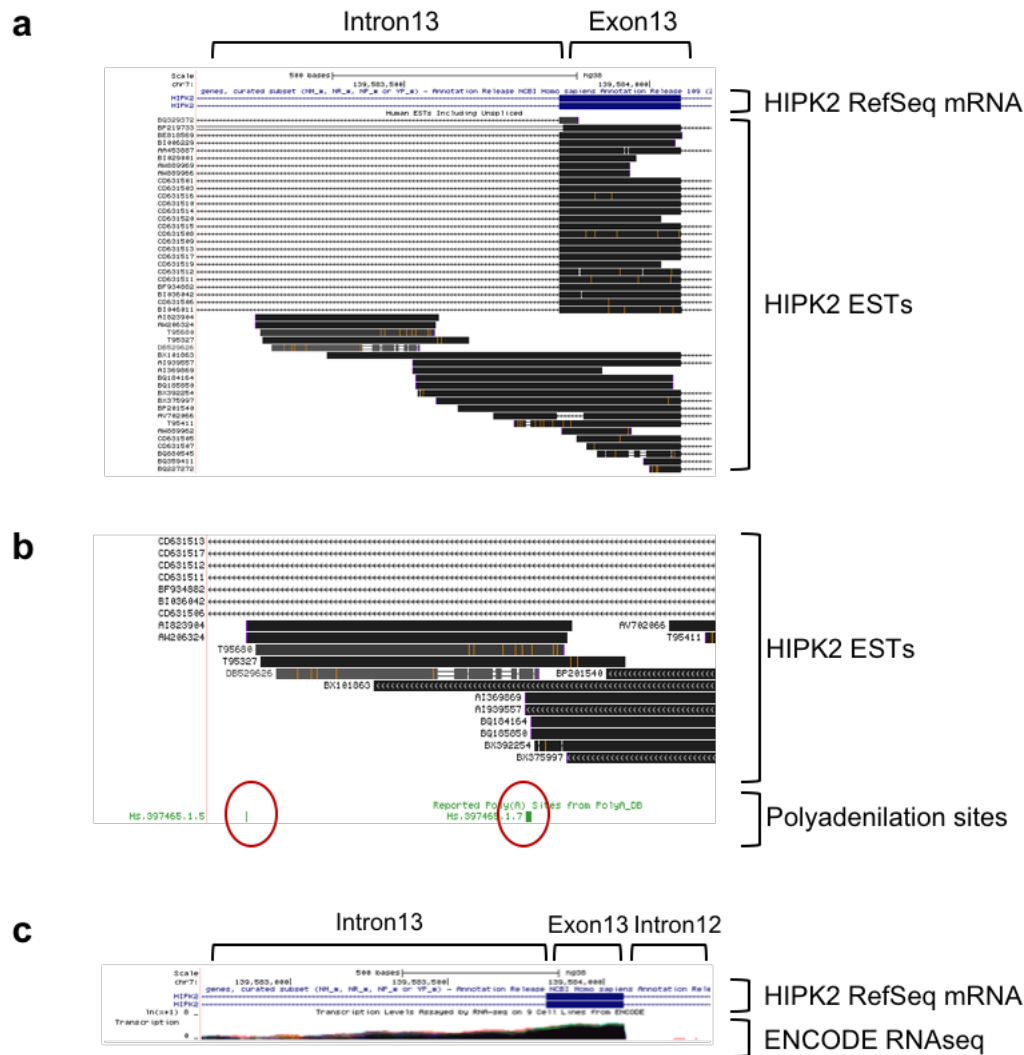

**Figure S1.** (related to Figure 1) In silico analyses of HIPK2 isoforms. (a) Screenshot taken from UCSC Genome Browser (<https://genome-euro.ucsc.edu>) representing annotated RefSeq sequences and expressed sequence tags (ESTs) including both spliced and unspliced. (b) Screenshot from UCSC Genome Browser indicating reported polyadenylation sites form polyA\_DB database ([http://exon.umdj.edu/polya\\_db/](http://exon.umdj.edu/polya_db/)). (c). Screenshot taken from UCSC Genome Browser showing high-throughput sequencing of polyadenylated RNA (RNAseq) signals from nine different human cell lines by ENCODE project (<https://genome-euro.ucsc.edu/cgi-bin/hgTrackUi?g=wgEncodeCaltechRnaSeq>).

## Supplementary Figure S2

**a**

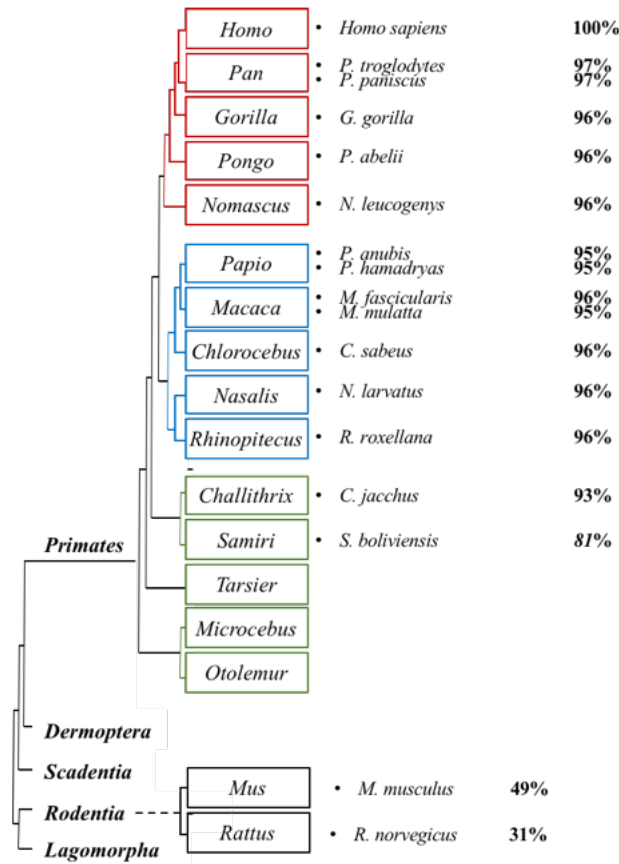

**b**

|                                   |                         |       |
|-----------------------------------|-------------------------|-------|
| GNLGPGQGRNLSLESGFPFLLLEMLLYGS*    | Homo sapiens            | 100%  |
| GNLGPGQDRNISLESGFPVFLLLEMLLYGS*   | Pan troglodytes         | 90%   |
| GNLGPGQDRNISLESGFPVFLLLEMLLYGS*   | Pan paniscus            | 90%   |
| GNLGPGQDRNISLESGFPVFLLLEMLLYGS*   | Gorilla gorilla gorilla | 90%   |
| GNLGPGQDRNISLESGFPVFLLLEMLLYGS*   | Pongo pygmaeus abelii   | 90%   |
| GNLGPGQDRNISLESGFPVFLLLEMLLYGS*   | Nomascus leucogenys     | 90%   |
| GNLGPGQDRNISLESGFPVFLLLEMLLYGS*   | Chlorocebus sabeus      | 90%   |
| GNLGPGQDRNISLESGFPVFLLLEMLLYGS*   | Macaca fascicularis     | 90%   |
| GNLGPGQDRNISLESGFPVFLLLEMLLYGS*   | Macaca mulatta          | 86,7% |
| GNLGPGQDRNISLESGFPVFLLLEMLLYGS*   | Papio anubis            | 86,7% |
| GNLGPGQDRNISLESGFPVFLLLEMLLYGS*   | Papio hamadryas         | 86,7% |
| GNLGPGQDRNISLESGFPVFLLLEMLLYGS*   | Nasalis narvatus        | 90%   |
| GNLGPGQDRNISLESGFPVFLLLEMLLYGS*   | Rhinopithecus roxellana | 90%   |
| GNLGPGQDRNISLESFPFAFLLLEMLLYGS*   | Callithrix jacchus      | 86,7% |
| GNLGPGQDRNISLESFPVFL----LLYGSWYNG | Saimiri boliviensis     |       |
| GNLGPGQARTISLETGFPVFGC*           | Tarsius syrichta        |       |
| GNLGPHSHAISSLFSFSAIRNVSTSETEHT*   | Mus musculus            |       |
| GNLGPR----ISLLFLFSAIRNVSTSETEHT*  | Rattus norvegicus       |       |

**Figure S2.** (related to Figure 1) HIPK2-S sequence is conserved at nucleotide and aminoacidic level. **(a)** Phylogenetic tree illustrating sequence conservation among primates, indicated as percentage of nucleotide identity. Rat and mouse are also reported. **(b)** Predicted mRNA sequences were in silico translated and the resulting HIPK2-S specific peptide sequences were aligned. The percentage of aminoacid identity is indicated.

### Supplementary Figure S3

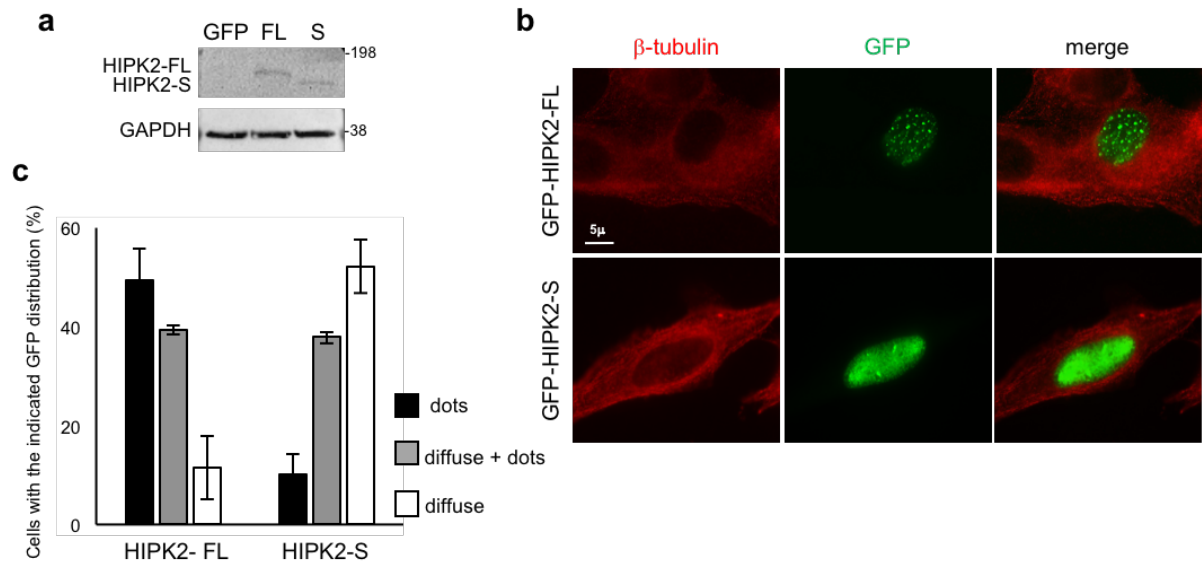

**Figure S3.** (related to Figure 3) HIPK2-S shows a more diffuse nuclear staining than HIPK2-FL also in immortalized human fibroblasts (HFs). (**a-c**) HFs were transfected with vectors expressing GFP-tagged HIPK2-FL or HIPK2-S and analyzed 24 h post-transfection by WB and IF after staining anti-β-tubulin to visualize cytoplasm (red). Representative WB and immunostainings are shown in **a** and **b**, respectively; bar, 5μM. Data quantification are reported in **c**, the values are mean ± SD from 2 independent experiments, in which total 130 cells per condition were analyzed.

### Supplementary Figure S4

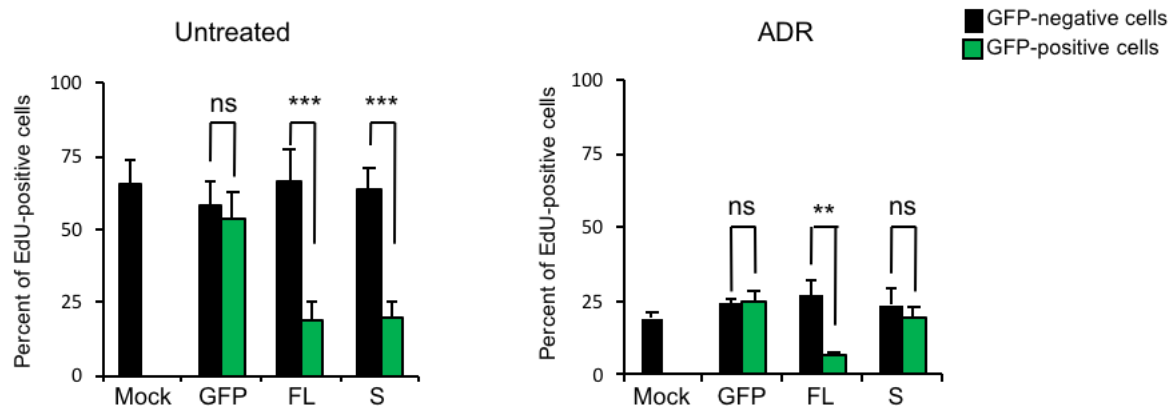

**Figure S4.** (related to Figure 4a) HIPK2 isoforms in DNA damage response. U2OS cells were transfected with expression vectors for the indicated GFP-tagged HIPK2 isoforms. Cells were maintained in non-treated (NT) condition or treated with 0.6 μM ADR for 48 h (ADR). Inhibition of cell proliferation was assessed by EdU-incorporation and subsequent fluorescence. The percentage of EdU-positive cells was measured in GFP-positive and GFP-negative cells. Transfected GFP-positive cells and non-transfected GFP-negative cells belong to the same dishes evaluated in Figure 4a. Data represent the mean ± SD of three independent experiments. \*\*  $p < 0.01$ ; \*\*\*  $p < 0.001$ ; ns  $p > 0.05$ .

## Supplementary Figure S5

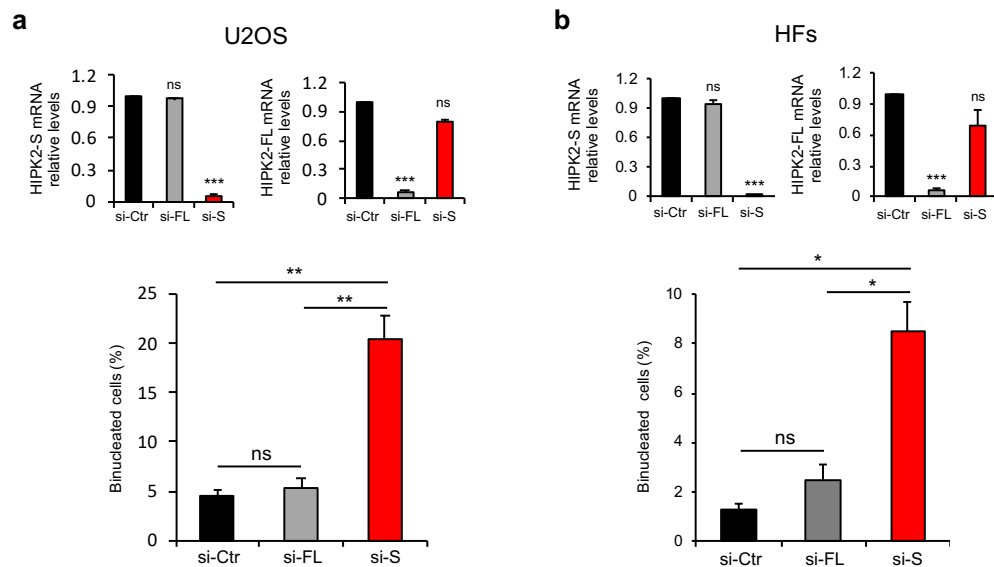

**Figure S5.** (related to Figure 5) HIPK2-S is required for successful cytokinesis in normal and tumor cells. **(a)** U2OS cells were transfected with the indicated siRNAs (numbers 1 and 2, see Table 2) and analyzed 72 h post-transfection by qPCR to verify RNA interference and by IF to score binucleated cells as described in Figure 5. At least 200 cells per condition were analyzed. Values are mean  $\pm$  SD from 3 independent experiments \*\* p<0.001; \*\*\* p<0.0001. In the qPCR panels, t-test is relative to si-Ctr. **(b)** HFs were transfected with indicated stealth siRNAs (numbers 3 and 4, see Table 2) and analyzed 72 h post-transfection as in **a**. Values are mean  $\pm$  SD from 2 independent experiments. \* p<0.05; \*\*\* p<0.001. In the qPCR panels, t-test is relative to si-Ctr.

## Supplementary Figure S6

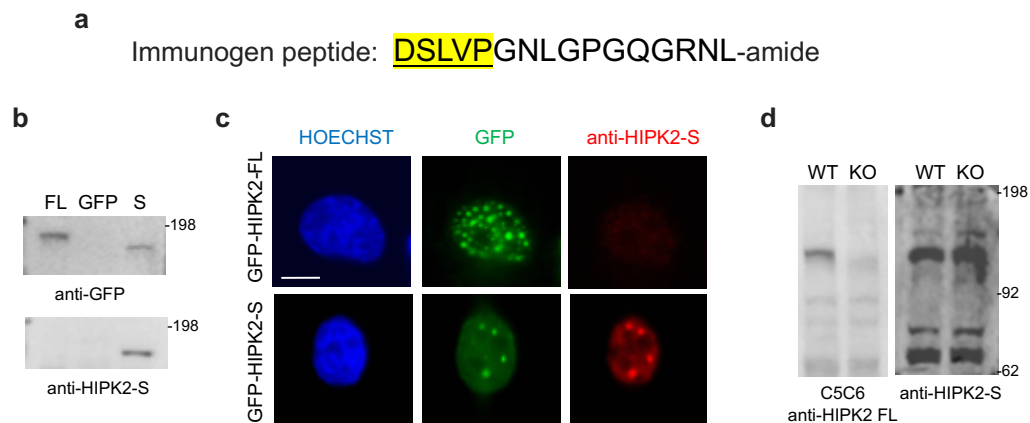

**Figure S6.** (related to Figure 6) Anti-HIPK2-S Ab production and validation. **(a)** Peptide sequence used for immunization is reported; the aminoacids in common with HIPK2-FL are underlined and highlighted in yellow. **(b, c)** HIPK2-null HeLa cells were transfected with vectors expressing GFP-tagged HIPK2-FL or HIPK2-S and analyzed 24 h post-transfection by WB and IF. Representative WB and immunostainings are shown. Bar, 5  $\mu$ m. Data show that our anti-HIPK2-S Ab specifically recognizes exogenously expressed HIPK2-S isoform. **(d)** Total cell extracts from HIPK2 proficient (WT) and HIPK2-null (KO) HeLa cells were analyzed by WB using the C5C6 rat mAb (kindly provided by M.L. Schimtz), that recognizes only the HIPK2-FL isoform because was raised against the C-Ter region of HIPK2, and our anti-HIPK2-S Ab. No specific signal(s) was detected on the endogenous proteins with our anti-HIPK2-S Ab.
